# Supplementary material for: Highly Specialized Carbohydrate Metabolism Capability in Bifidobacterium Strains Associated with Intestinal Barrier Maturation in Early Preterm Infants
Source: PubMed Central journal article supplement (PMC9239261; doi:10.1128/mbio.01299-22), 2022-06-13
Supplement: mbio.01299-22-s0003.pdf [file mbio.01299-22-s0003.pdf]

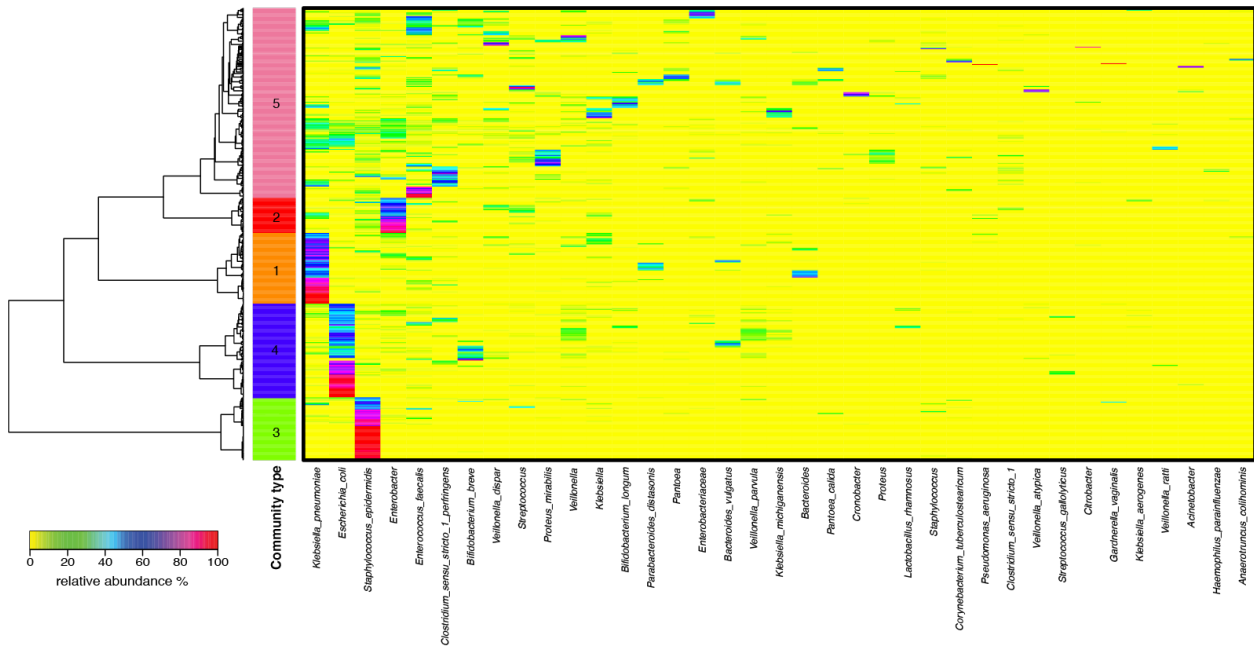

**FIG S3** Heatmap of the 50 most abundant intestinal bacterial taxa relative abundance in samples collected from 113 preterm infants enrolled in the study. The fecal microbiota was characterized by high-throughput sequencing of the V3-V4 variable regions of 16S rRNA genes. Ward linkage clustering was used to cluster samples based on their Jensen-Shannon distance calculated in *vegan* package in R (1). The number of clusters was validated using gap statistics implemented in the *cluster* package in R (2) by calculating the goodness of clustering measure.

1. Oksanen J, Blanchet FG, Kindt R, Legendre P, Minchin PR, et al. 2011. *vegan: Community Ecology Package. R package version 2.0-2.*
2. Maechler M. 2016. *cluster: "Finding Groups in Data": Cluster Analysis Extended Rousseeuw et al.*
